# Supplementary material for: Controlled synthesis of barium chromate multi-layered microdiscs and their photocatalytic activity
Source: Royal Society of Chemistry journal article supplement (doi:10.1039/c5ra23482d), 2015-12-18
Supplement: c5ra23482d1.pdf [file c5ra23482d1.pdf]

## Supporting information

### Controlled synthesis of barium chromate multi-layered microdiscs and their photocatalytic activity

Mattawan Japa<sup>a</sup>, Patchareeporn Panoy<sup>a</sup>, Supanan Anuchai<sup>a</sup>, Sukon Phanichphant<sup>b</sup>, Piyarat

Nimmanpipug<sup>a</sup>, Sulawan Kaowphong<sup>a</sup>, Doldet Tantraviwat<sup>c</sup> and Burapat Inceesungvorn<sup>a,\*</sup>

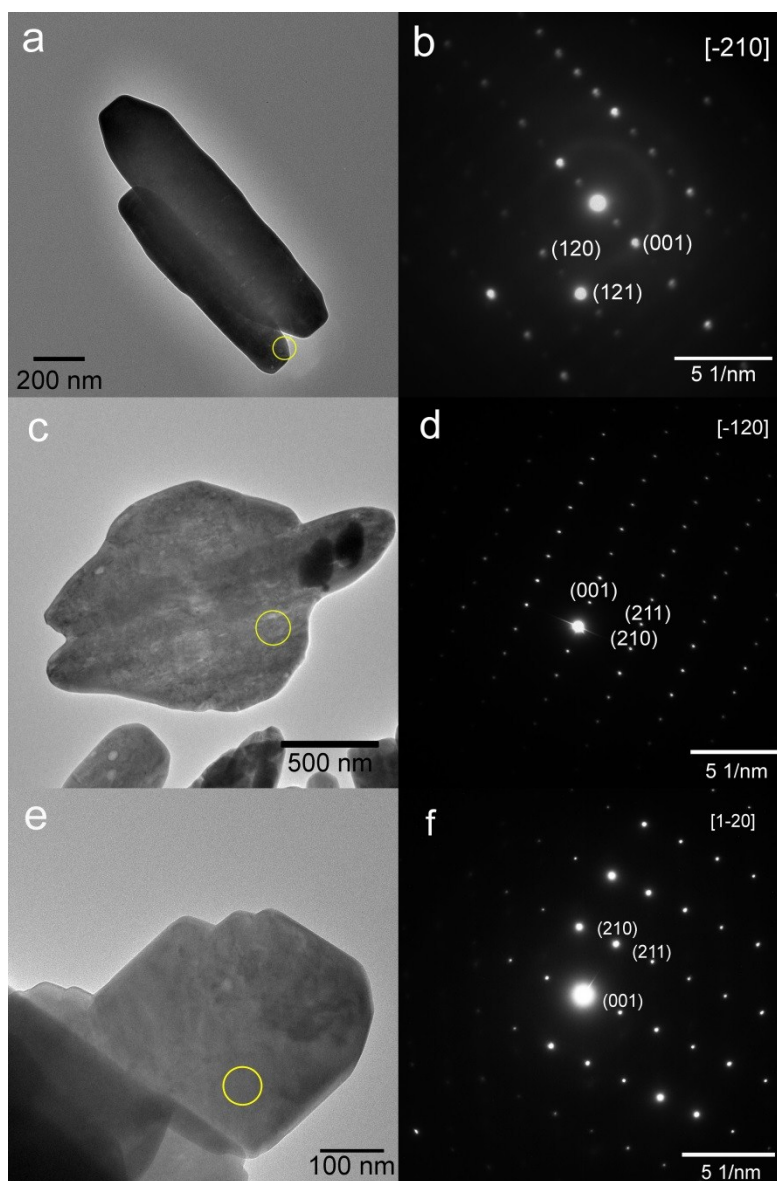

**Fig. S1** TEM images and the corresponding SAED patterns of BaCrO<sub>4</sub> obtained under different

Ba<sup>2+</sup>/C<sub>2</sub>O<sub>4</sub><sup>2-</sup> molar ratios: (a, b) 1: 0, (c, d) 1: 0.5 and (e, f) 1: 1.

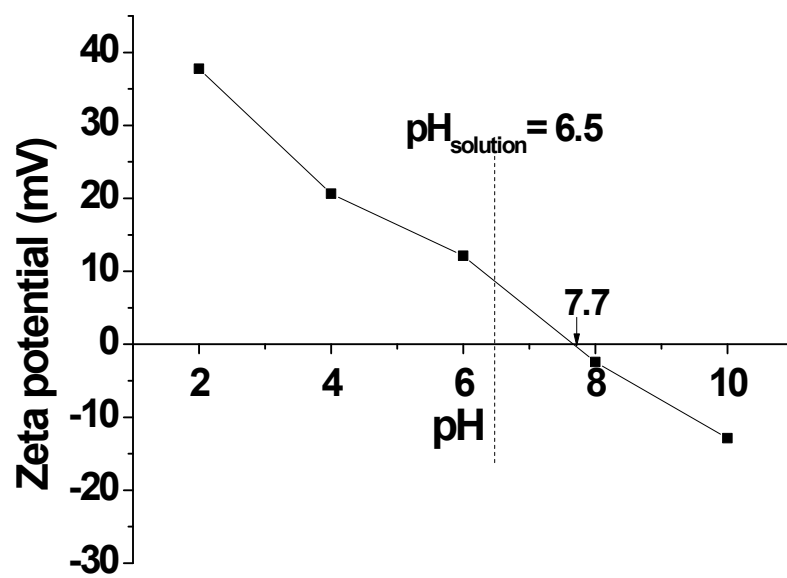

Fig. S2 Zeta potential of BaCrO<sub>4</sub> discs as a function of pH.
